# Supplementary material for: The nutrient sensor CRTC and Sarcalumenin/thinman represent an alternate pathway in cardiac hypertrophy
Source: PubMed Central journal article supplement — Cell Rep. Author manuscript; Available in PMC 2024 Sep 15. (PMC11402474; doi:10.1016/j.celrep.2024.114549), 2024-08-01
Supplement: NIHMS2019520-supplement-1.pdf [file NIHMS2019520-supplement-1.pdf]

**Cell Reports, Volume 43**

**Supplemental information**

**The nutrient sensor CRTC and Sarcalumenin/thinman  
represent an alternate pathway  
in cardiac hypertrophy**

**Cristiana Dondi, Georg Vogler, Anjali Gupta, Stanley M. Walls, Anaïs Kervadec, James Marchant, Michaela R. Romero, Soda Diop, Jason Goode, John B. Thomas, Alex R. Colas, Rolf Bodmer, Marc Montminy, and Karen Ocorr**

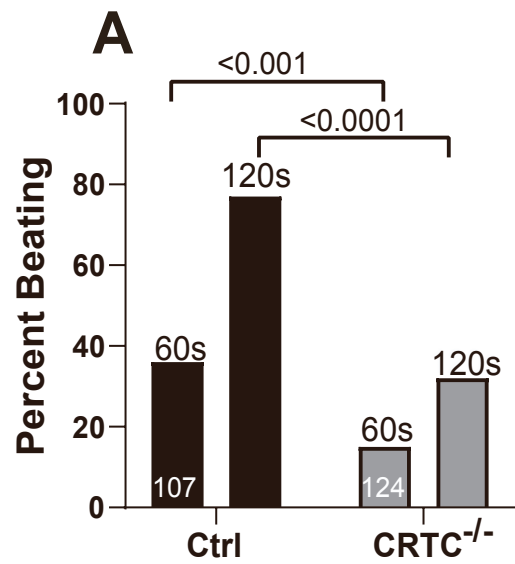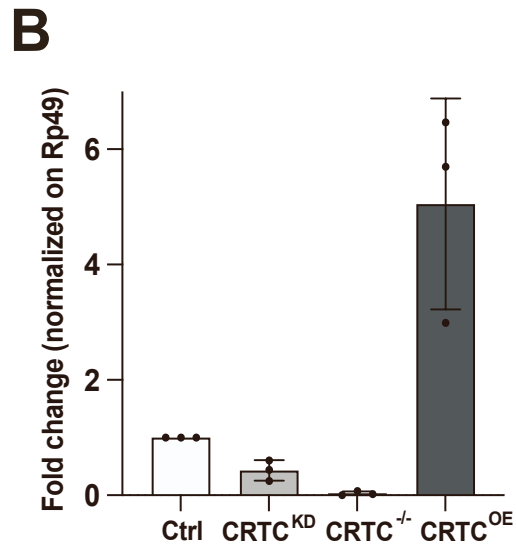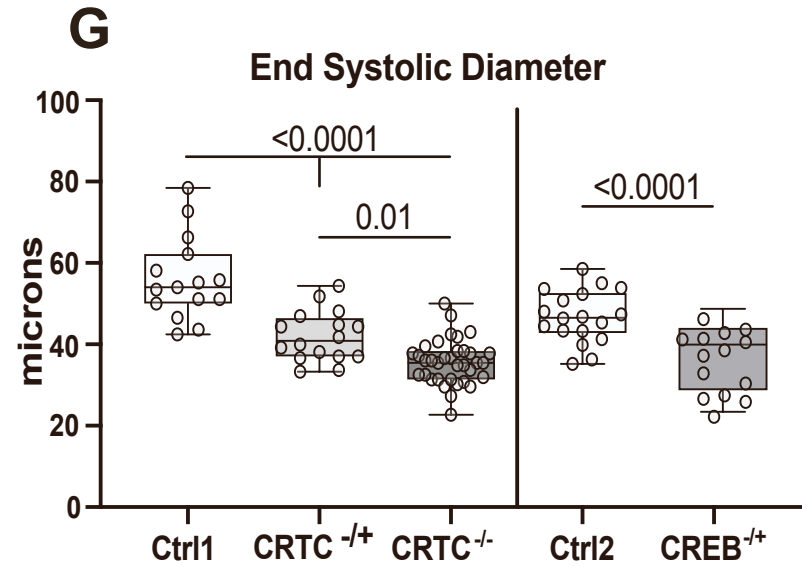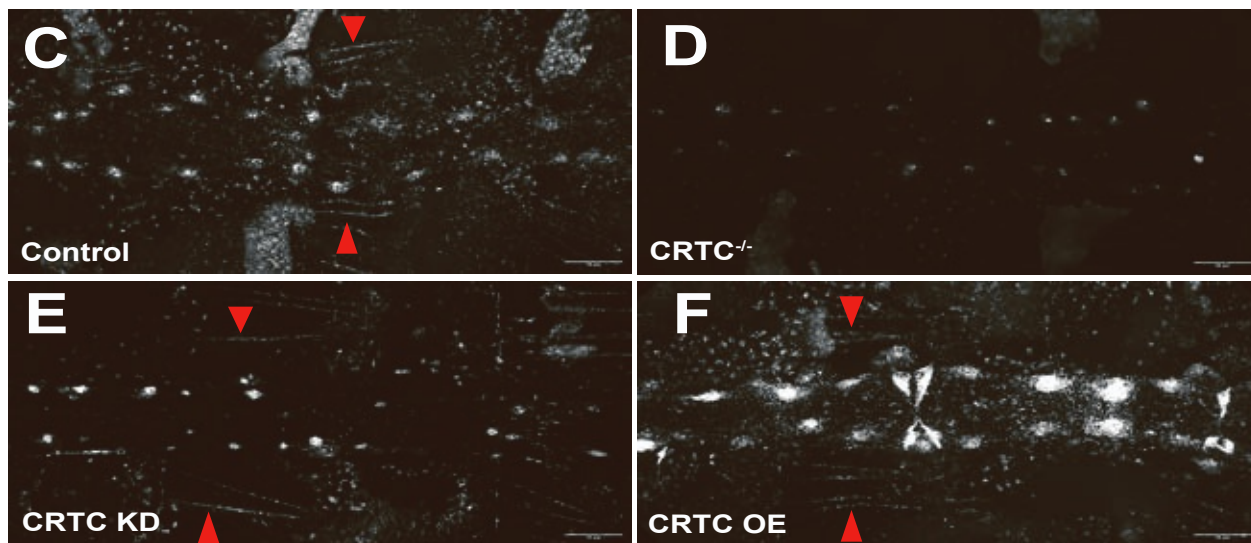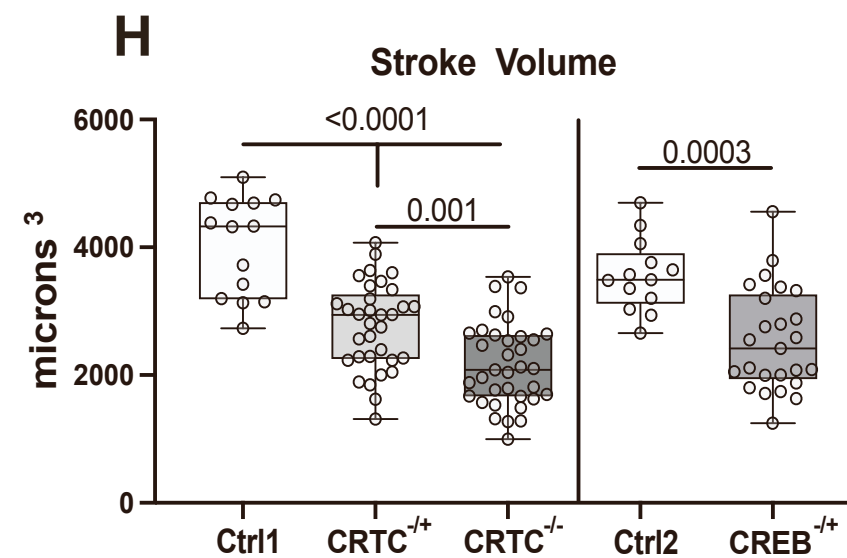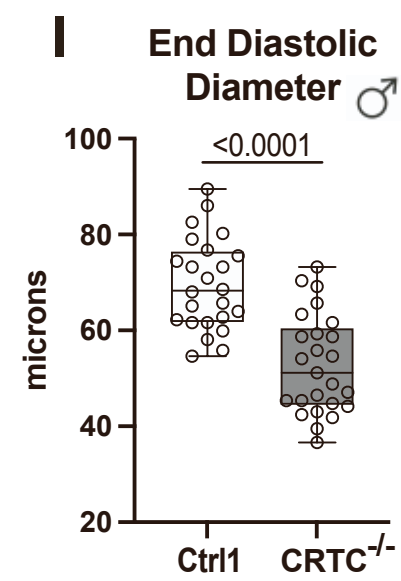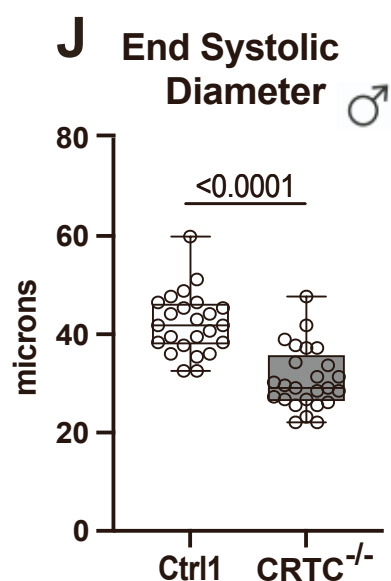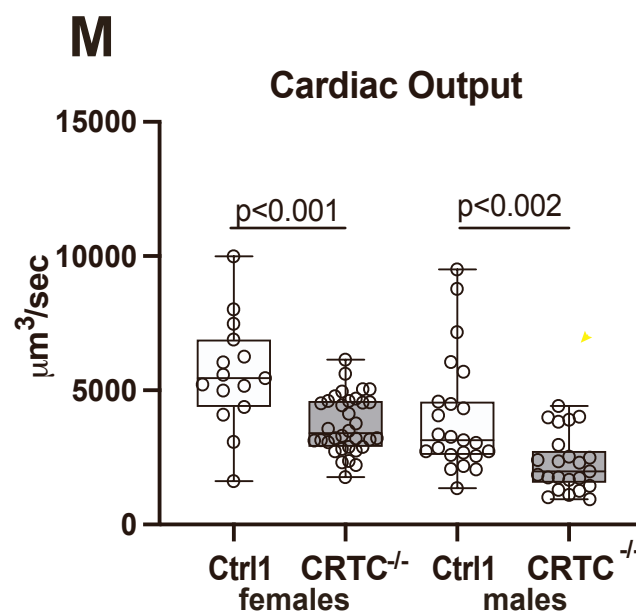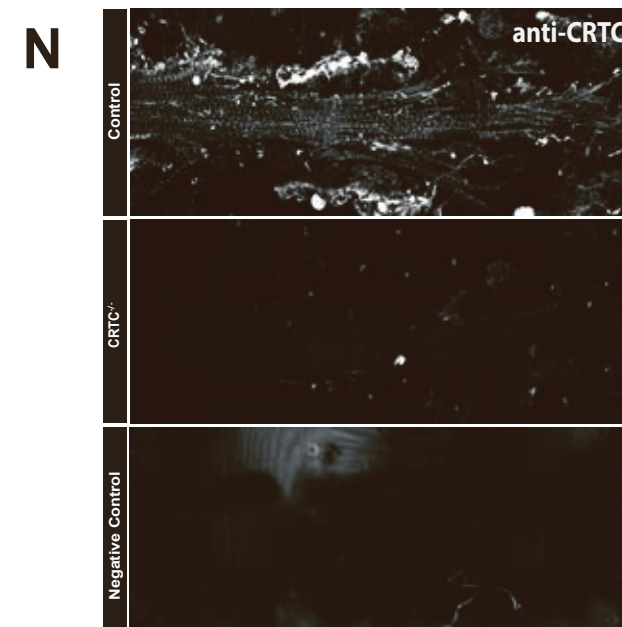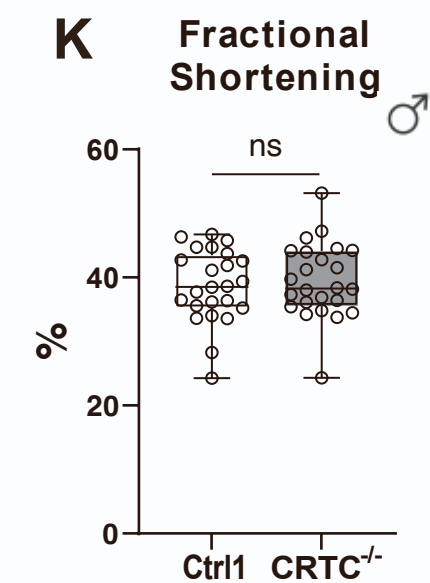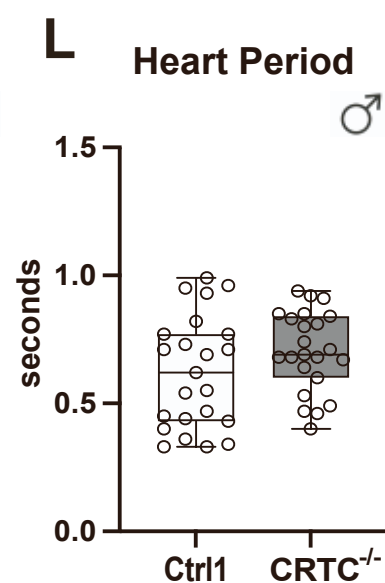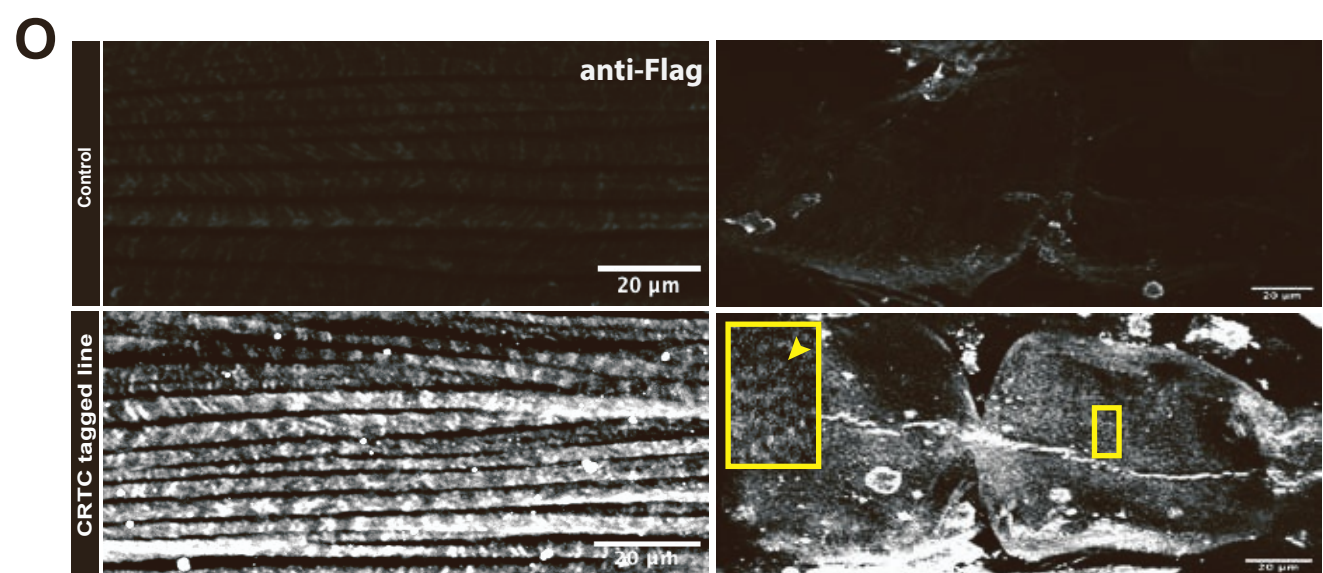

**Supplemental Figure 1 – Deletion of *CRTC* makes flies more susceptible to stress-induced heart failure and causes cardiac dysfunction.**

**(A)** Heart Failure assay showing the percent of hearts still beating following a 30 sec electrical pacing stress test. Approximately 60% of hearts in wt flies (w1118, N=107) were not beating 60s after electrical pacing (6HZ for 30s); all but ~20% resumed beating by 120s post stress. Roughly 80% of hearts in *CRTC* mutants (N=124) were not beating 60s post pacing stress and more than 60% were still not beating at 120s. Significance determined by Multiple Mann-Whitney tests.

**(B)** RT-qPCR of isolated fly hearts validates *CRTC* mutant, KD and OE fly lines. 3 biological replicates for each condition done in triplicate.

**(C)** HCR for *CRTC* shows *CRTC* mRNA expression in cardiac tube, nuclei and somatic muscle (red arrowhead) in controls.

**(D)** *CRTC* mRNA expression is dramatically reduced in cardiac tube, nuclei, fat body, and somatic muscle in *CRTC* mutants.

**(E)** *CRTC* expression is significantly reduced in *CRTC* KD hearts compared to controls, but expression in somatic muscle (red arrowheads) is maintained.

**(F)** *CRTC* mRNA expression is significantly increased in *CRTC* OE hearts compared to controls, but expression in somatic muscle (red arrowheads) remains similar to that of controls.

**(G) Left** - End systolic diameter was reduced in both *CRTC* hetero and homozygous mutants compared to controls. **Right** - End systolic diameter was also reduced in *CREB* heterozygous mutants compared to controls.

**(H) Left** – Stroke volume was reduced in both *CRTC* hetero and homozygous mutants compared to controls. **Right** – Stroke volume was also reduced in *CREB* heterozygous mutants compared to controls. Significance was determined by 1-way ANOVA for Wt1 and *CRTC* mutants with Sidak's multiple comparison post hoc test. and unpaired student t-test for Wt2 and *CREB* mutant. (All data points, Max, Min and Median with p values are shown.)

**(I)** End diastolic diameters, **(J)** end systolic diameters, and **(K)** fractional shortening were all reduced in hearts from 1 week old *CRTC* mutant male flies compared to Wt controls. **(L)** Unlike females, heart period was unaffected by *CRTC* loss in males but **(M)** cardiac output was still significantly reduced. Significance was determined by 1-way ANOVA for Wt1 and *CRTC* mutants with Sidak's multiple comparison post hoc test. and unpaired student t-test for Wt2 and *CREB* mutant. (All data points, Max, Min and median with p values are shown.)

**(N)** Anti-CRTC staining of wt heart (top) shows a lattice like pattern over the longitudinal fibers and is present in fat bodies. A heart from a *CRTC* null mutant (middle) shows background staining. The negative control (bottom) was stained only with the secondary antibody.

**(O)** Anti-Flag staining (white) of hearts from a *CRTC* Flag-tagged transgenic line confirmed the banded pattern for *CRTC* localization in non-myocardial, ventral longitudinal fibers (left). Optical section through a chamber of the fly heart tube stained with anti-Flag (right) confirmed the myocardial expression. Higher magnification of the region in the box shows a loose banding pattern (arrowheads) similar to that seen with the *CRTC* antibody. Scale bars are 20  $\mu$ m.

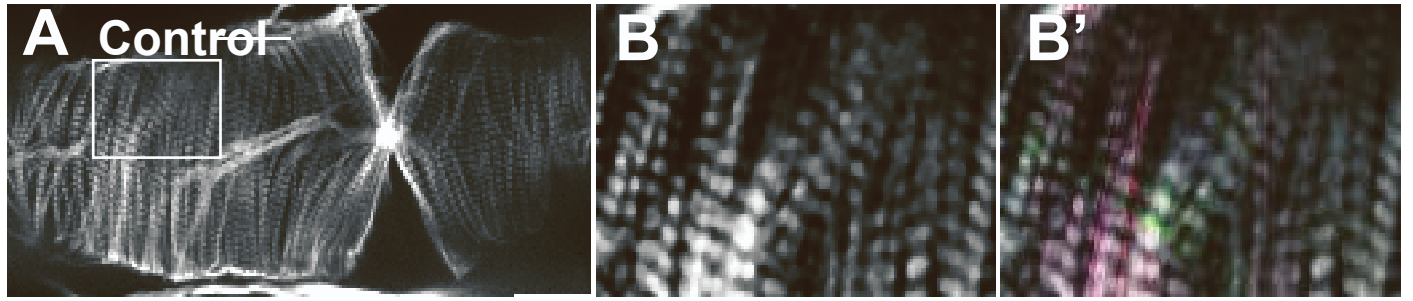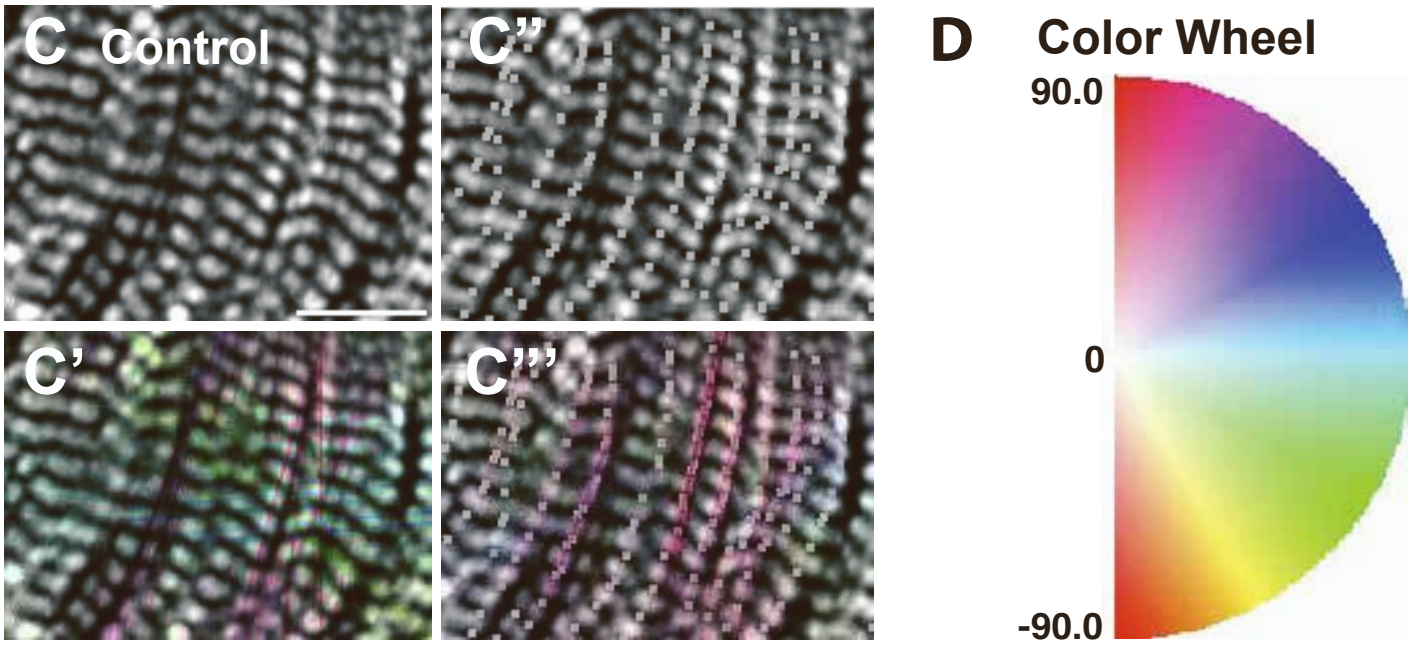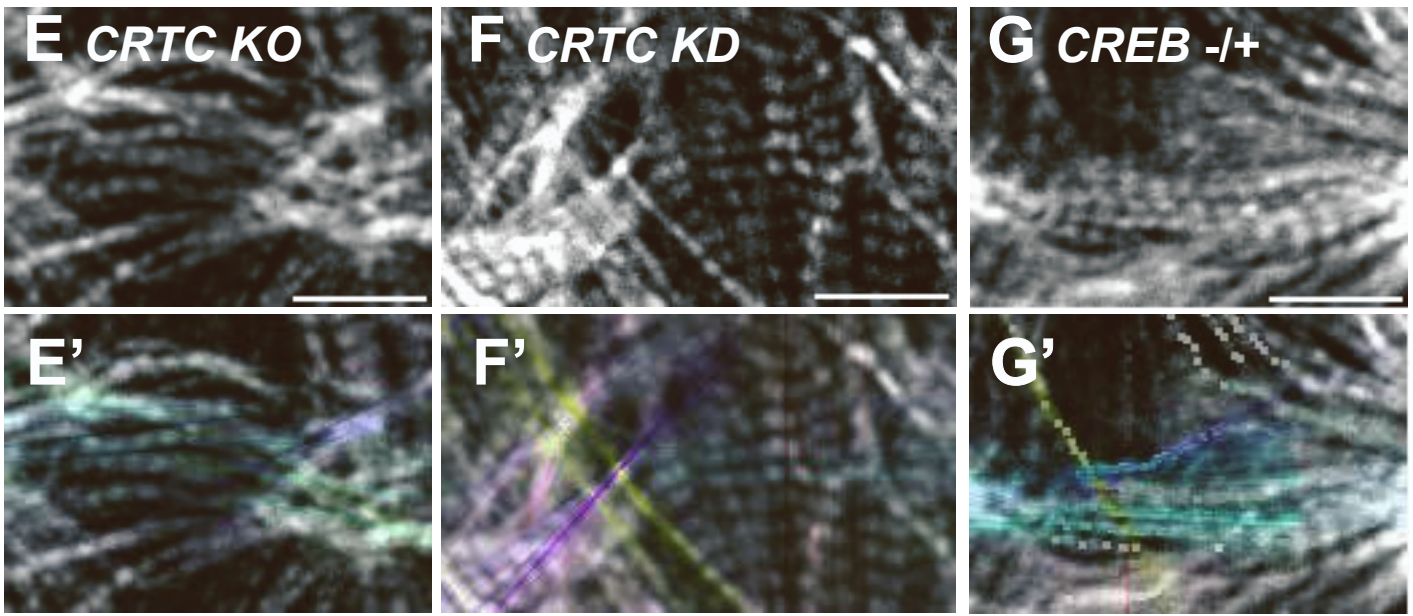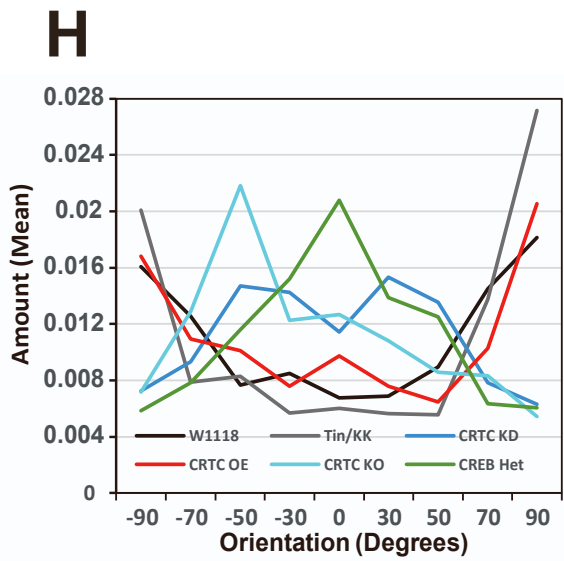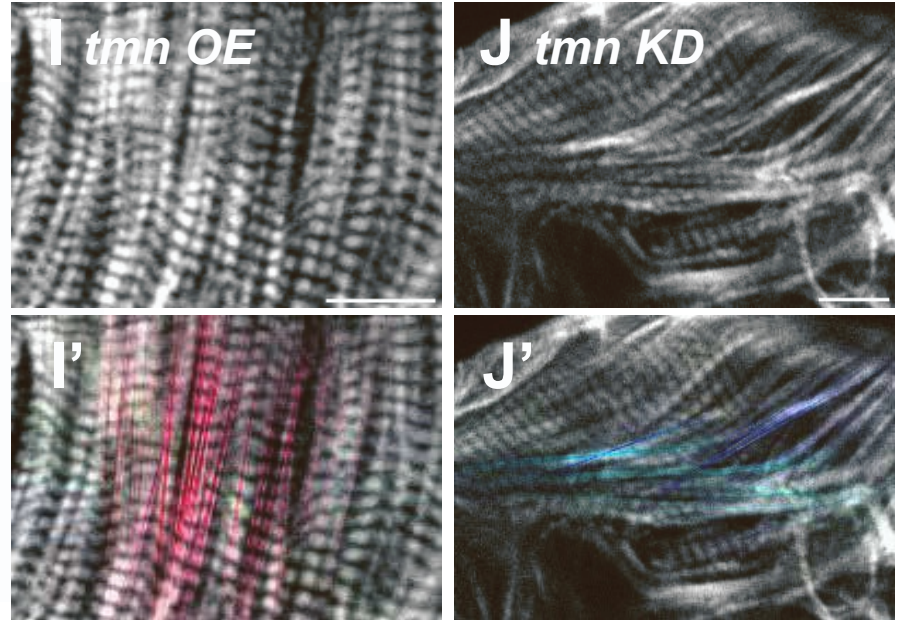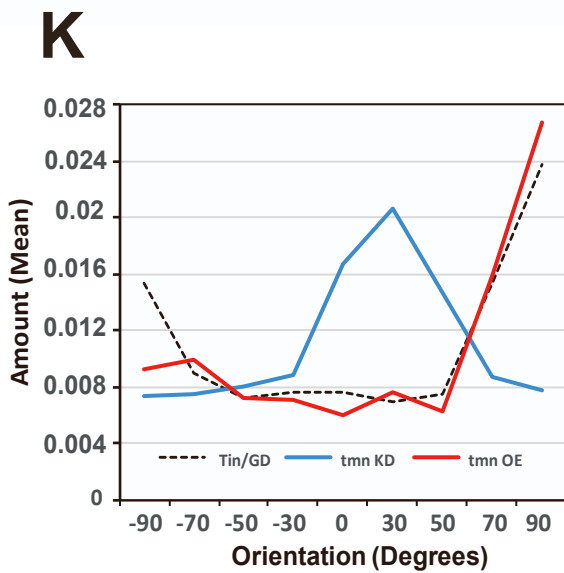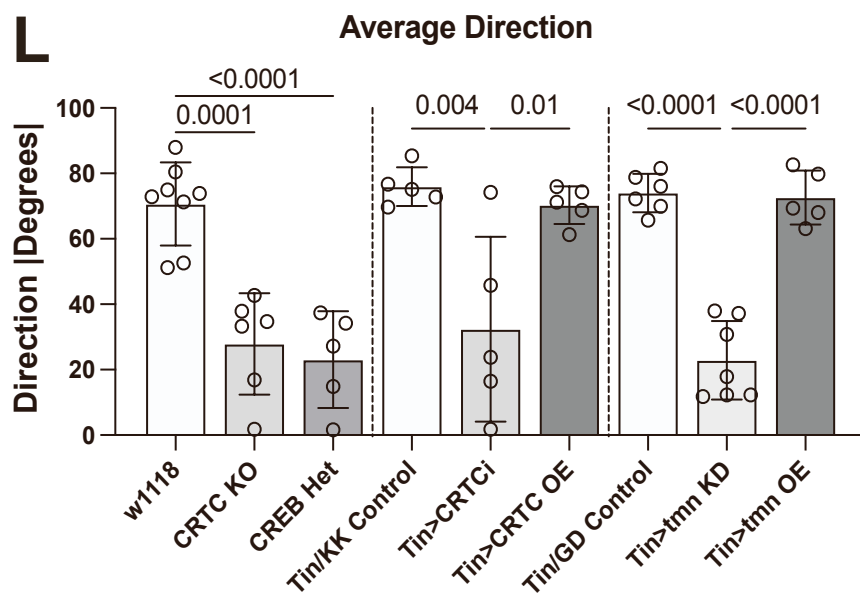

## Supplemental Figure 2 – Quantification of Myofibrillar Disorganization.

- (A) Z stack image of one heart chamber from a horizontally oriented heart (anterior – posterior). (B-B') ROIs of myofibrils from individual myocardial cells were analyzed using the Directionality Plugin in FIJI (see Methods).
- (C) Example Z stack from a myocardial cell in a  $w^{1118}$  wildtype control heart stained with phalloidin for F-actin (all scale bars are 50 pixels/13 microns). (C') Orientation map from the Direction function in FIJI showing correctly identified vertically oriented myofibrils (orange and red). Additional detected elements labeled as horizontally oriented (purple, blues, and greens) are due to the regular arrangement of the unstained (dark) myosin bands. (C'') The myosin bands in (C) have been filled with the same color gray as the adjacent actin bands. (C''') The Orientation map based on the image in C'' shows fewer incorrectly detected horizontal myofibrils (more red, less blue and green).
- (D) Color wheel showing the orientation in degrees for the differently colored elements in the orientation maps.
- (E) Example of a Zstack from a myocardial cell in a *CRTC* mutant heart.
- (E') Orientation map based on (E) shows correctly identified horizontal myofibrils (Blues, greens).
- (F) Example of a Zstack from a myocardial cell in a *CRTC* cardiac KD heart.
- (F') Orientation map based on (F) shows correctly identified horizontal myofibrils (Purples, blues, greens).
- (G) Example of a Zstack from a myocardial cell in a *Creb* heterozygote heart.
- (G') Orientation map based on (G), with myosin "fill in", shows correctly identified horizontal myofibrils (Yellows, blues, greens).
- (H) Directionality of identified structures was analyzed in Image J and results were binned according to their orientation (from  $-90^\circ$  to  $+90^\circ$ , in  $20^\circ$  bins). The mean amount is plotted for each bin. Both  $w^{1118}$  and tin-Gal4 controls as well as *CRTC* OE hearts showed peaks at  $-90^\circ$  and  $+90^\circ$  (both vertical orientations), whereas hearts from *CRTC* null mutants, cardiac *CRTC* KD, and *Creb* heterozygotes had peaks around  $0^\circ$  (more horizontal orientations).
- (I) Example of a Zstack from a myocardial cell in a *tmn* cardiac OE heart.
- (I') Orientation map based on (I) showing correctly identified vertical myofibrils.
- (J) Example of a Zstack from a myocardial cell in a *tmn* cardiac KD heart. (J') Orientation map based on (J) showing correctly identified horizontal myofibrils.
- (K) Plots of directionality for tin-Gal4 outcrossed controls as well as *tmn* OE hearts showed peaks at  $-90^\circ$  and  $+90^\circ$  (vertical orientations), whereas hearts from cardiac *tmn* KD hearts had a peak around  $30^\circ$  (more horizontal orientation).
- (L) "Direction" reports the orientation (in degrees) for the center of the highest peak in each sample based on a gaussian fit. The absolute values of "Direction" for each heart were averaged and plotted; significance was determined by one way ANOVA and Tukey's multiple comparisons post hoc test, p values are shown

**A** Control

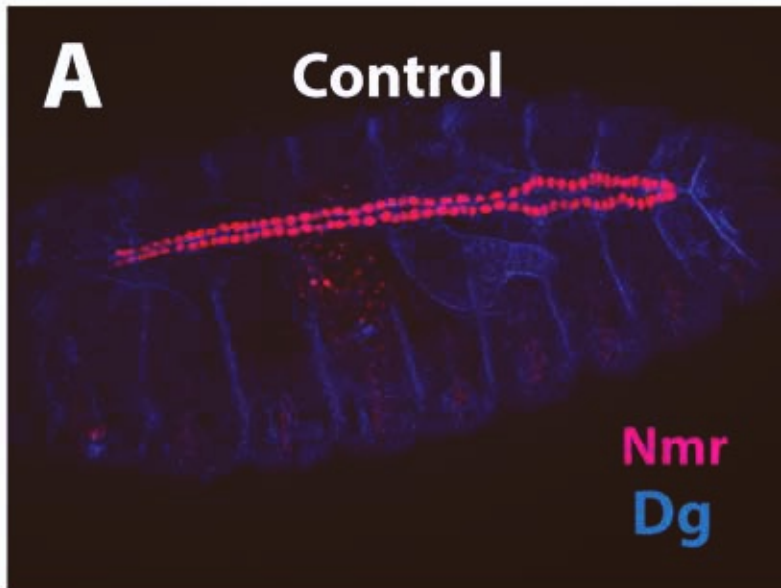

**D** CRTC<sup>-/-</sup>

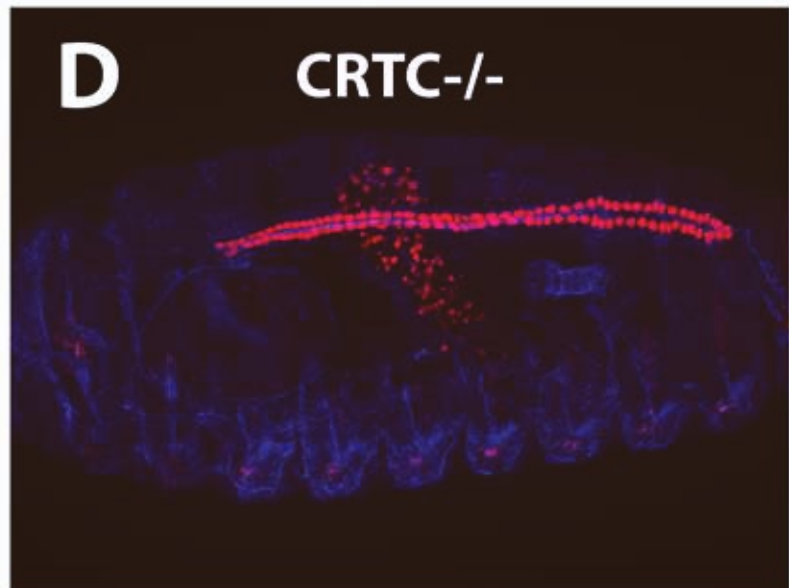

**B** Zfh1  
dMef2

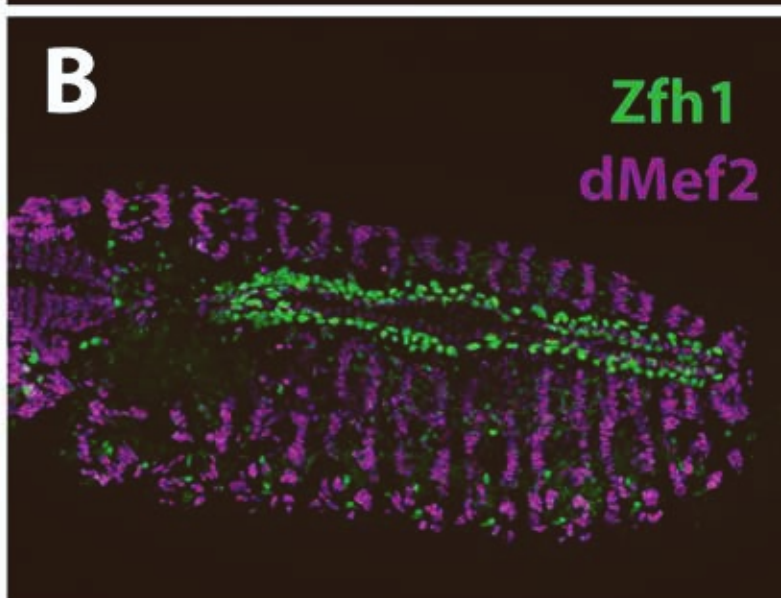

**E**

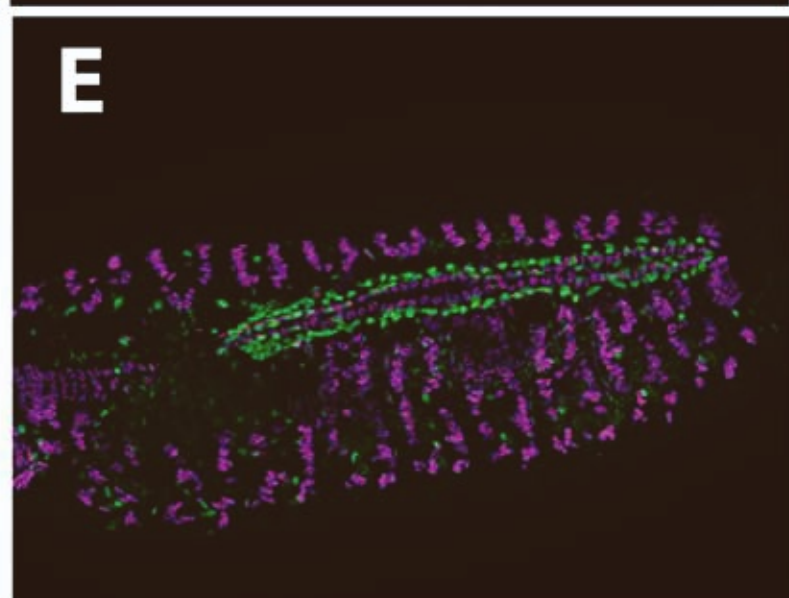

**C** Svp

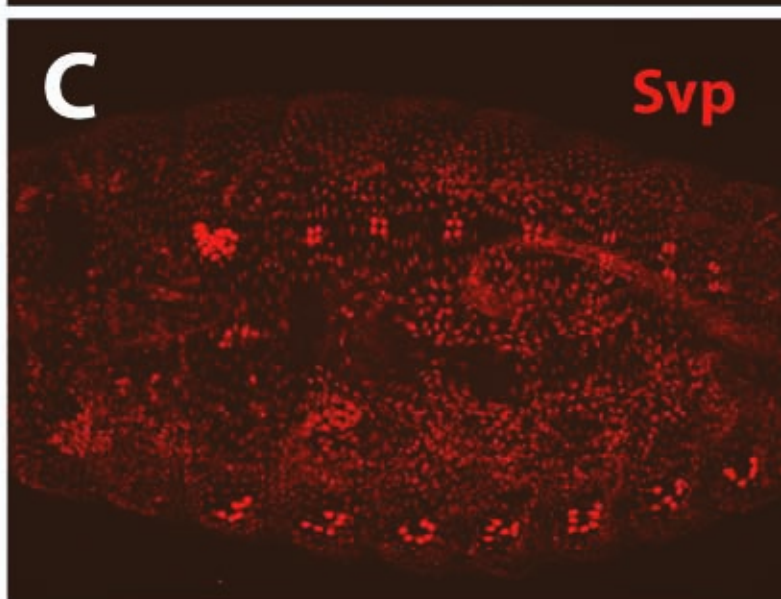

**F**

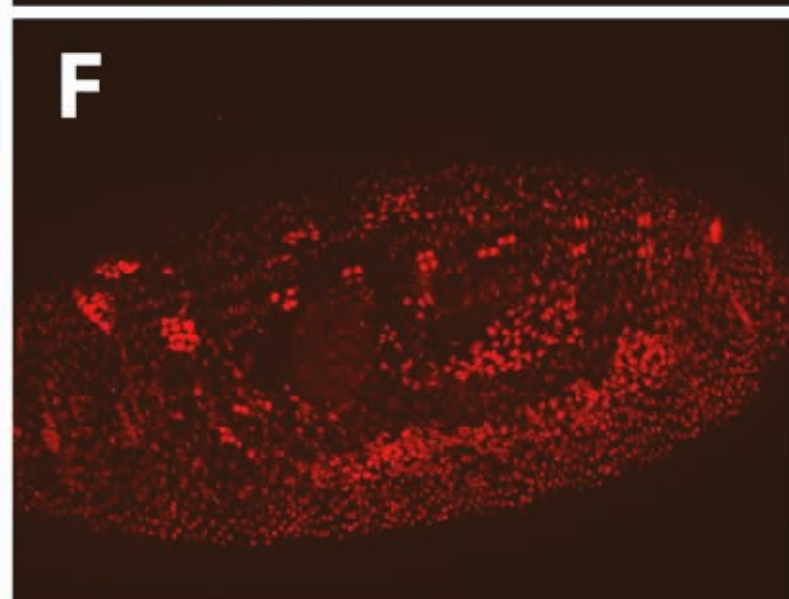

**Supplemental Figure 3 - Systemic *CRTC* KO did not affect cardiac development.**

**(A-C)** Stage 17 wt and **(D-F)** *CRTC* mutant embryos were examined for cardiac development.

**(A, D)** Wildtype and *CRTC* mutant embryos were stained with antibodies against Neuromancer (Nmr) which labeled cardioblast nuclei (red), and dystroglycan (Dg) which labels the basal domain of epithelial cells (blue). **(B,E)** Anti-Zfh1 (green) labeled the nuclei of pericardial cells and anti-dMEF2 (purple) stained all muscle nuclei. **(C,F)** Anti-Svp labels a subset of cardiac cells that will form the ostia (inflow tract).

**A** End Systolic Diameter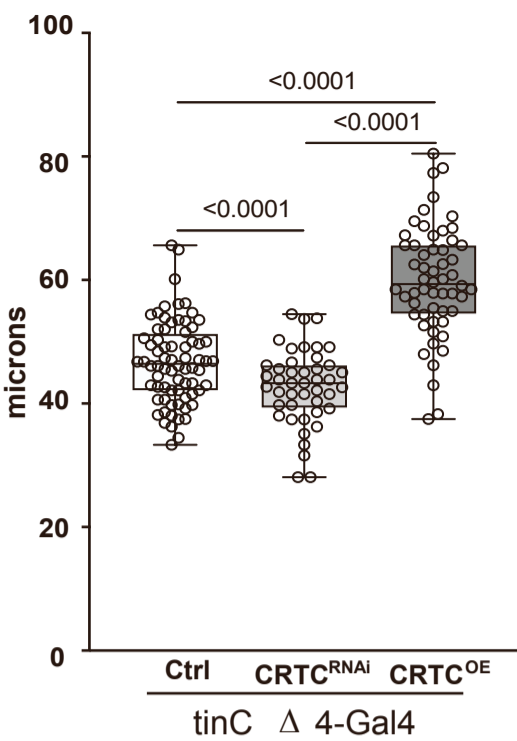**B** Stroke Volume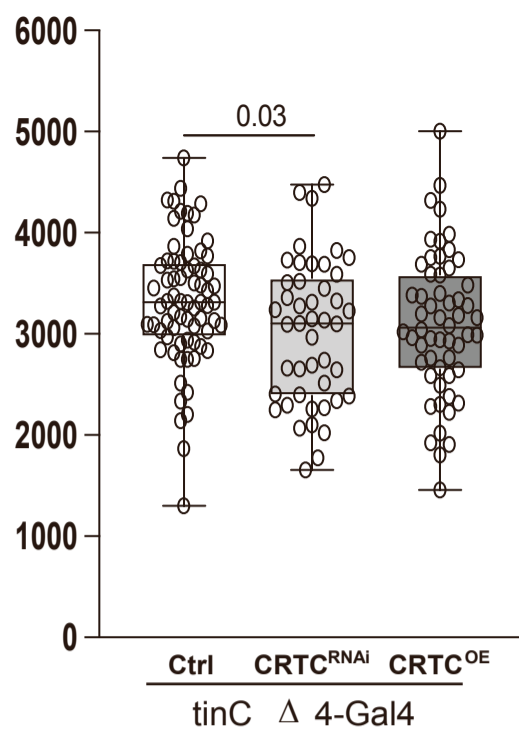**C** Diastolic Interval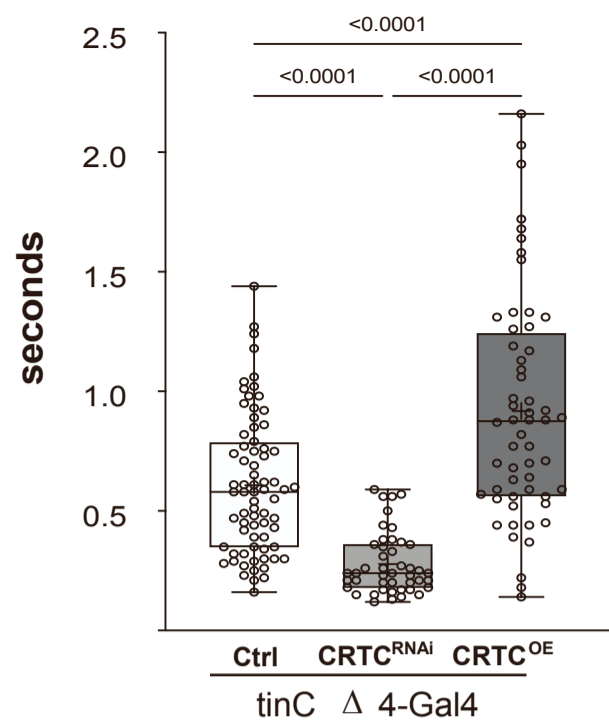**D** End Diastolic Diameter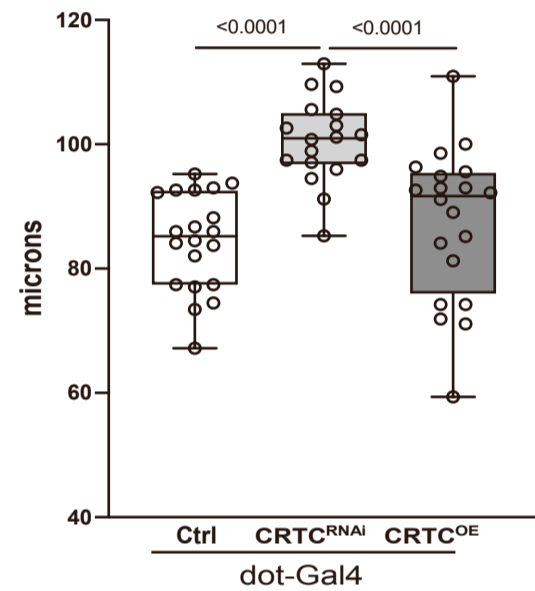**E** Fractional Shortening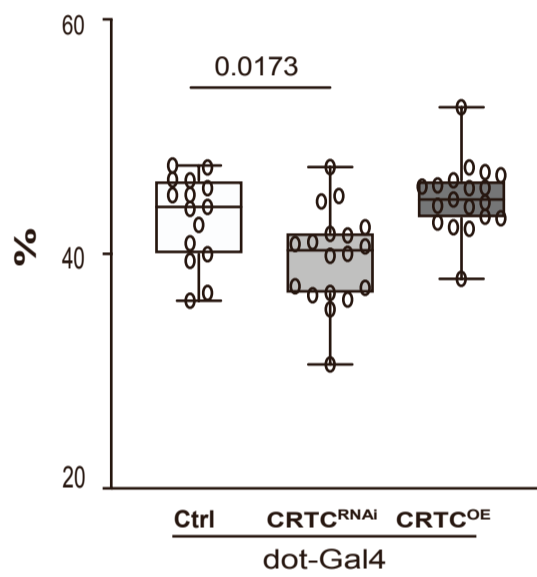**F** Heart Period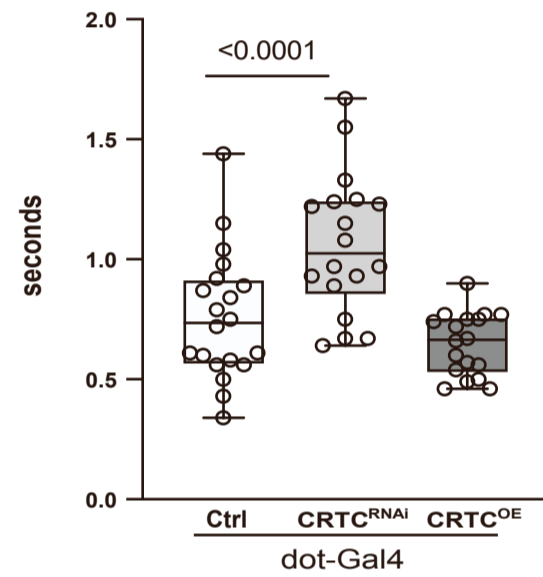**G**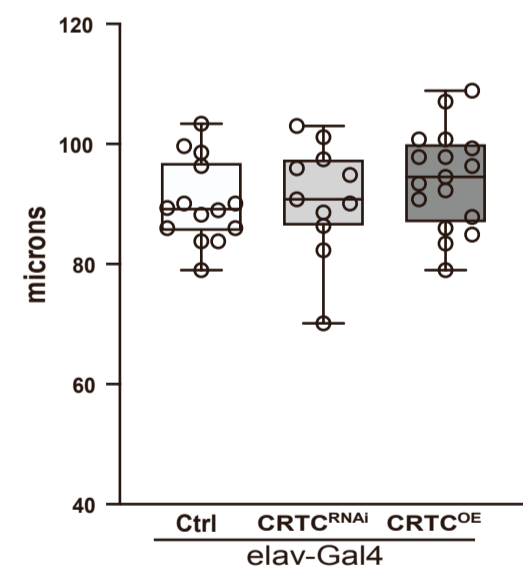**H**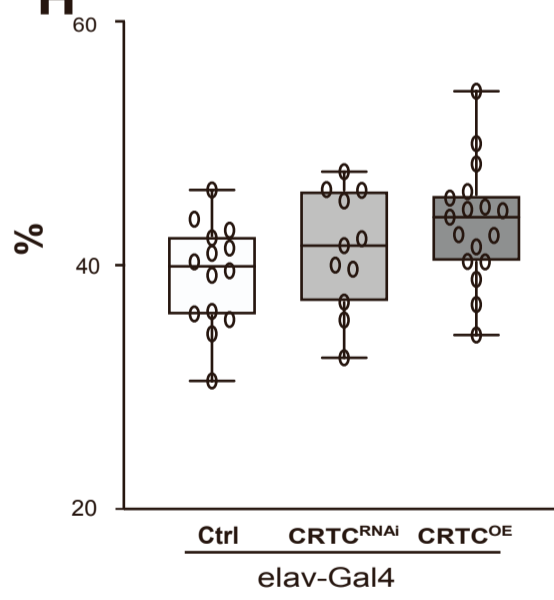**I**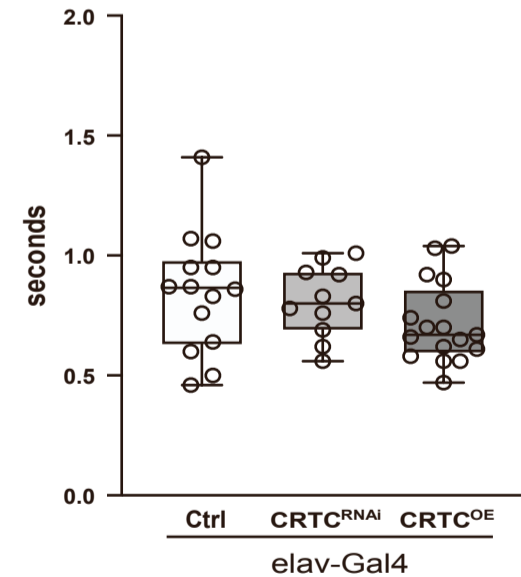**J**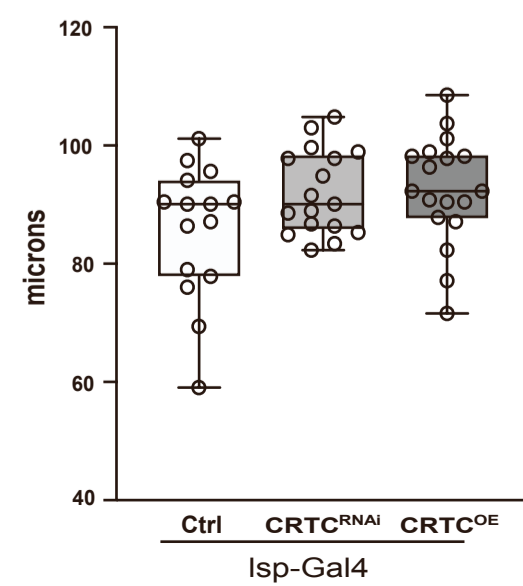**K**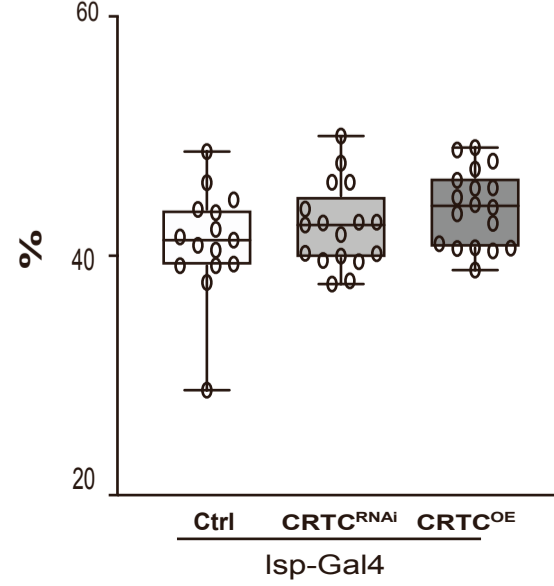**L**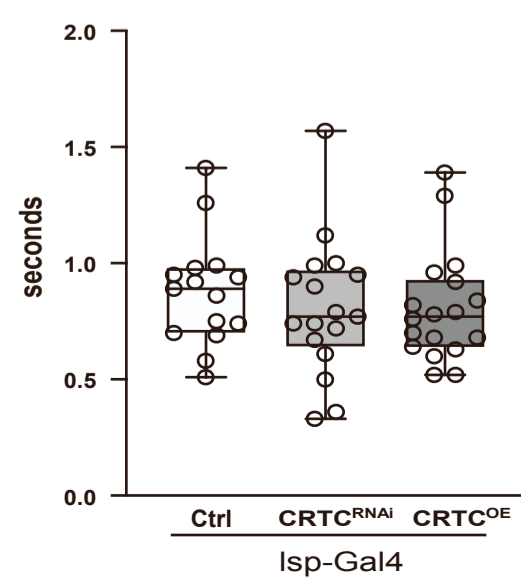



**Supplemental Figure 4 – *CRTC* cardiac phenotype was not recapitulated by *CRTC* KD in nephrocytes, neurons, or fat body.**

**(A)** End Systolic Diameter was decreased in cardiac-specific KD of *CRTC* using tinC $\Delta$ 4-Gal4 driver and increased in cardiac-specific *CRTC* OE. **(B)** Stroke volume was reduced by cardiac-specific *CRTC* KD and unchanged in cardiac OE hearts. **(C)** Diastolic Interval was decreased in cardiac-specific *CRTC* KD and increased in cardiac specific *CRTC* OE, using the Dot-Gal4 driver. **(D)** End Diastolic Diameter (EDD) was increased by nephrocyte-specific KD of *CRTC*. **(E)** Fractional Shortening was decreased by nephrocyte-specific *CRTC* KD. **(F)** Heart Period was increased by nephrocyte-specific KD of *CRTC*. **(G)** EDD, **(H)** fractional shortening, and **(I)** heart period were unaffected by neuronal KD or OE of *CRTC*, using the elav-Gal4 driver. **(J)** EDD, **(K)** fractional shortening, and **(L)** heart period were unaffected by fat body-specific *CRTC* KD or OE. Plots show Max, Min and Median, significance was determined using a one-way ANOVA with Tukey's multiple comparisons post hoc test, p values shown.

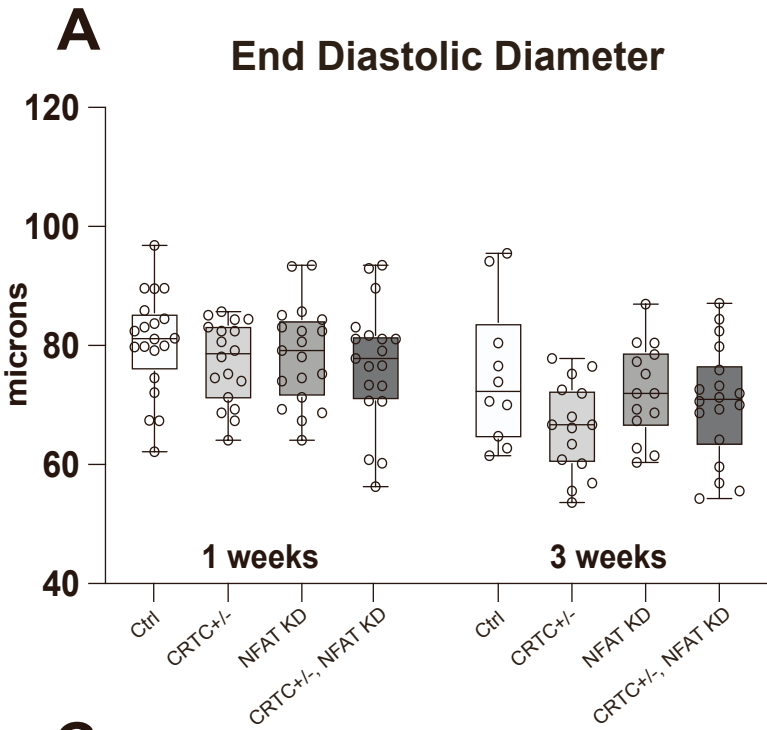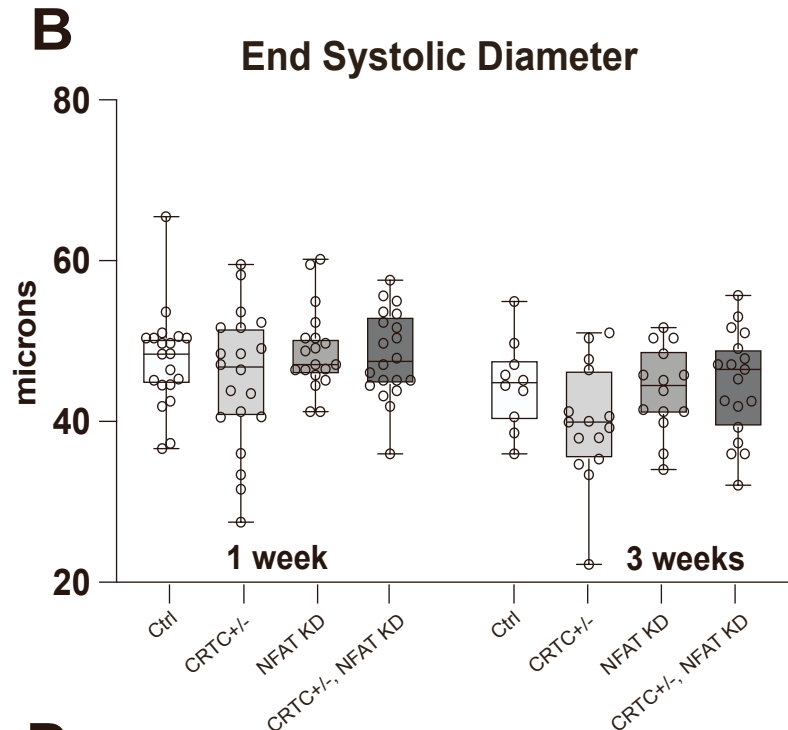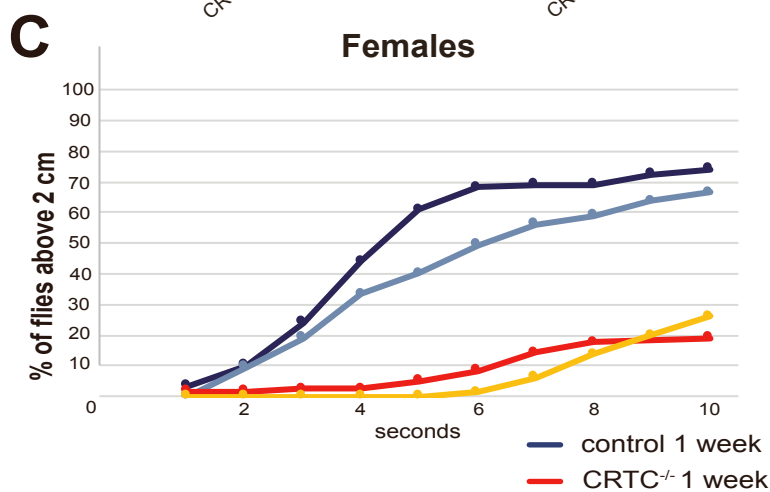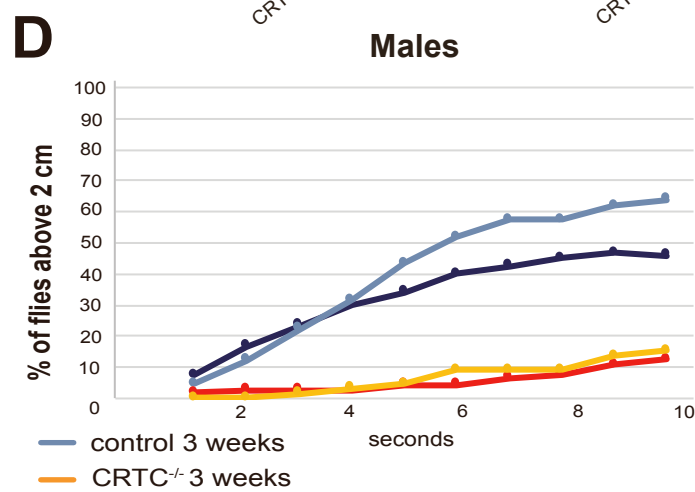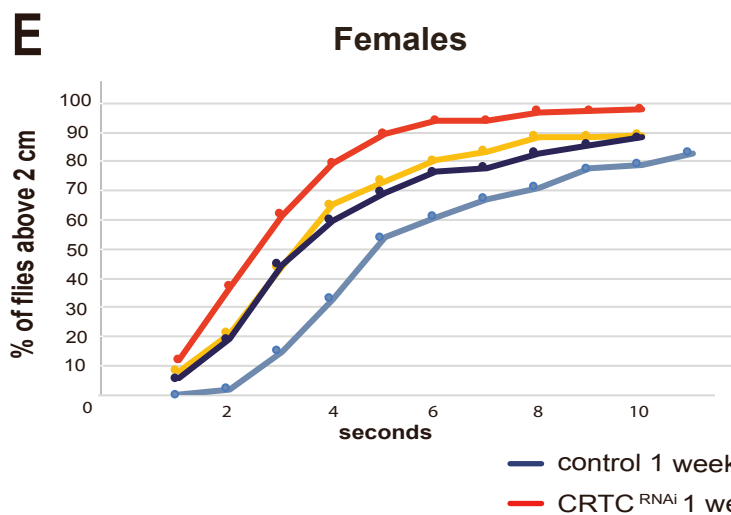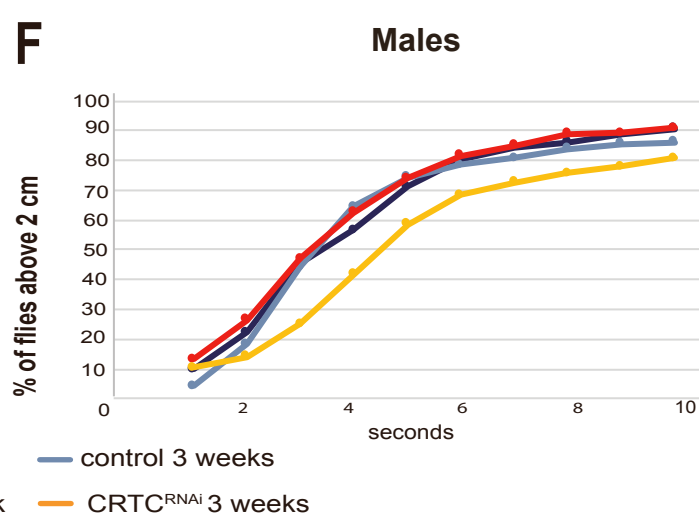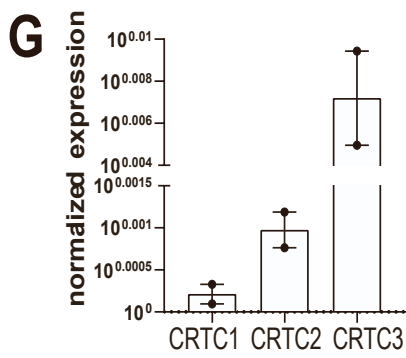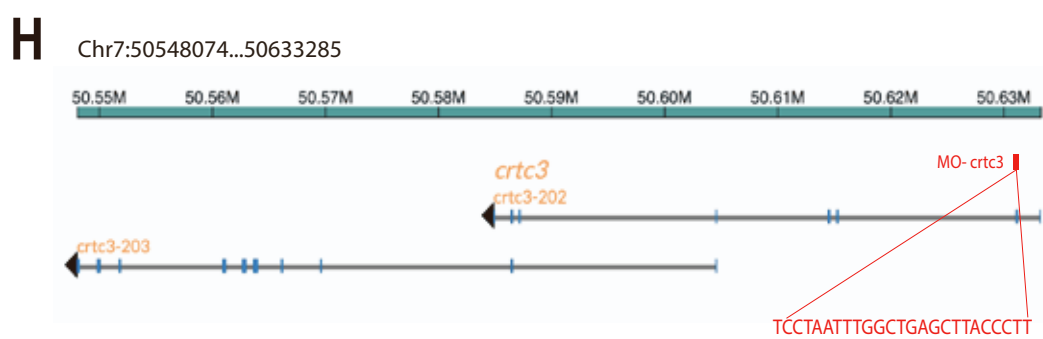

**Supplemental Figure 5 - CRTC affects somatic muscle function but cardiac KD of *NFAT* had little effect on heart function.**

**(A)** End Diastolic Diameters were unchanged in response to cardiac *NFAT* KD with tinCΔ4-Gal4.

**(B)** End Systolic Diameters in hearts from flies with cardiac *NFAT* KD were unchanged. Combined loss of function of *CRTC* and *NFAT* had no significant effects. Plots show all data points, Max, Min and Median; significance was determined using a one-way ANOVA with Tukey's multiple comparisons post hoc test.

**(C-F)** Climbing assay results; flies were assayed at 1 and 3 weeks.

**(C)** Female control flies (traces in blues; 1 week old n=40, 3 weeks old n= 35) and *CRTC systemic mutants* (traces in red/orange; 1 week old n=40, 3 weeks old n= 27) were assayed and the percent of flies above the 2 cm mark in the assay vial over a 10 sec interval is shown.

**(D)** Percent of male control flies (traces in blues; 1 week old n=40, 3 weeks old n= 36) and *CRTC systemic mutant flies* (traces in red/orange; 1 week old n=40, 3 weeks old n= 22) the 2 cm mark in the assay vial over a 10 sec interval is shown.

**(E)** Percent of female control flies (traces in blues; 1 week old n=222, 3 weeks old n= 210) and *cardiac-specific CRTC KD* flies (traces in red/orange; 1 week old n=228, 3 weeks old n= 210) above the 2 cm mark over a 10 sec interval is shown.

**(F)** Percent of male control flies (traces in blues; 1 week old n=201, 3 weeks old n= 186) and *cardiac-specific CRTC KD* flies (traces in red/orange; 1 week old n=234, 3 weeks old n= 219) above the 2 cm mark over a 10 sec interval is shown.

**(G)** *CRTC* expression in isolated adult (10-month-old) zebrafish hearts, normalized to elongation factor eF1a, showed significant expression of *CRTC 3* compared to *CRTC 1 & 2*. Data points represent 2 biological samples, 8 hearts per sample done in triplicate.

**(H)** Schematic representation of binding locus for the *CRTC3* morpholino.

**A****CRTC-RNAi**

357 Upregulated

186 Downregulated

**CRTC RNAi**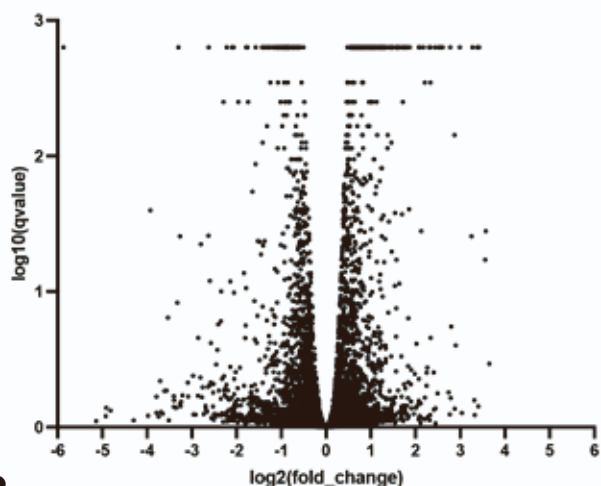

| Category      | Term                       | Count | FDR                     | Direction     |
|---------------|----------------------------|-------|-------------------------|---------------|
| BP_GO:0002181 | Translation / Ribosome     | 33    | 1.0 x 10 <sup>-23</sup> | Upregulated   |
| BP_GO:0045087 | Innate Immune Response     | 12    | 0.00864                 | Upregulated   |
| KEGG dme01100 | Metabolic Pathways         | 99    | 1.5 x 10 <sup>-15</sup> | Upregulated   |
| KEGG dme00010 | Glycolysis/Gluconeogenesis | 21    | 1.6 x 10 <sup>-11</sup> | Upregulated   |
| KEGG dme01230 | Amino acid Biosynthesis    | 21    | 5.1 x 10 <sup>-5</sup>  | Upregulated   |
| KEGG dme00030 | Pentose phosphate pathway  | 10    | 8.7 x 10 <sup>-6</sup>  | Upregulated   |
| KEGG dme00620 | Pyruvate Metabolism        | 12    | 1.4 x 10 <sup>-4</sup>  | Upregulated   |
| KEGG dme00071 | Fatty acid degradation     | 8     | 0.003                   | Upregulated   |
| KEGG dme00020 | Citrate (TCA) Cycle        | 9     | 0.006                   | Upregulated   |
| BP_GO:0007155 | Cell adhesion              | 7     | 0.00138                 | Downregulated |
| BP_GO:0030497 | Fatty acid elongation      | 4     | 0.0027                  | Downregulated |

**B****CRTC-OE**

426 Upregulated

390 Downregulated

**CRTC OE**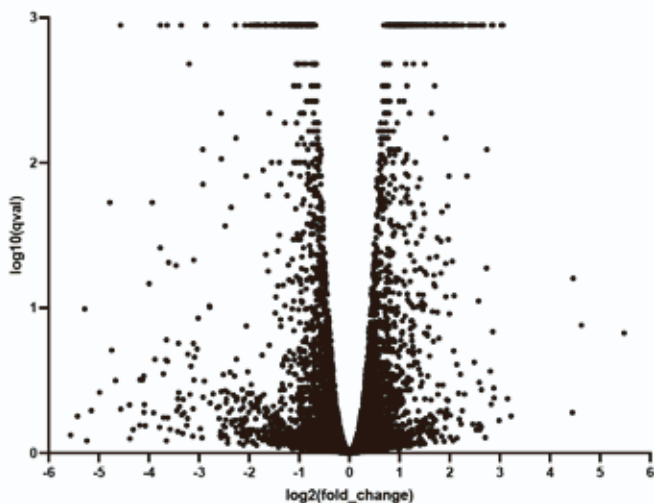

| Category      | Term                       | Count | FDR                     | Direction     |
|---------------|----------------------------|-------|-------------------------|---------------|
| BP_GO:0030497 | Fatty Acid Elongation      | 9     | 1.9 x 10 <sup>-4</sup>  | Upregulated   |
| BP_GO:0030239 | Myofibril Assembly         | 6     | 0.023                   | Upregulated   |
| KEGG dme04512 | ECM-receptor interaction   | 7     | 2.0 x 10 <sup>-7</sup>  | Upregulated   |
| KEGG dme01212 | Fatty Acid Metabolism      | 7     | 0.0012                  | Upregulated   |
| BP_GO:0055114 | Oxidation-Reduction        | 32    | 4.6 x 10 <sup>-4</sup>  | Downregulated |
| BP_GO:0045087 | Innate Immune Response     | 14    | 0.007                   | Downregulated |
| BP_GO:0006635 | Fatty acid Beta-Oxidation  | 8     | 0.015                   | Downregulated |
| KEGG dme01100 | Metabolic Pathways         | 78    | 5.3 x 10 <sup>-11</sup> | Downregulated |
| KEGG dme00071 | Fatty acid degradation     | 12    | 1.5 x 10 <sup>-5</sup>  | Downregulated |
| KEGG dme01230 | Amino acid Biosynthesis    | 10    | 0.001                   | Downregulated |
| KEGG dme00010 | Glycolysis/Gluconeogenesis | 9     | 0.001                   | Downregulated |

**C**

| Fly Gene | Human Gene        | Diopt Score | log2 (KK FPKM) | log2 (CRTCoe FPKM) | log2 (Ratio) | q Value  | Gene Product                    |
|----------|-------------------|-------------|----------------|--------------------|--------------|----------|---------------------------------|
| Act42A   | ACT A1, B, C1, G1 | 7-12        | 5.23           | 6.83               | 1.6          | 1.13E-03 | Actin                           |
| Argk     | Ck B, M           | 14          | 9.49           | 10.31              | 0.82         | 1.13E-03 | Arginine/ Creatine Kinase       |
| CanA-14F | PPPB              | 15          | 5.83           | 6.51               | 0.68         | 2.08E-03 | Phosphatase                     |
| CRTC     | CRTC1,2,3         | 8-11        | 3.47           | 5.18               | 1.72         | 1.13E-03 | Creb Modulator                  |
| jp       | JPH 1,2,3,4       | 7-13        | 5.36           | 6.44               | 1.08         | 1.13E-03 | Ca2+ signaling                  |
| Mhc      | MYH 1-8           | 11-14       | 7.13           | 7.96               | 0.83         | 1.13E-03 | Myosin heavy Chain              |
| Mlc2     | MYL2              | 6           | 9.34           | 10.14              | 0.8          | 1.13E-03 | Myosin light chain              |
| Pka-C3   | PRKX              | 13          | 4.47           | 5.95               | 1.48         | 1.13E-03 | Protein Kinase                  |
| timp     | TIMP 1,2,3,4      | 11-15       | 7.23           | 8.44               | 1.21         | 1.13E-03 | Inhibitor of metalloproteases   |
| TpnC25D  | CALM              | 6           | 5.62           | 8.03               | 2.41         | 1.13E-03 | Calmodulin Ca2+ binding protein |
| RyR      | RYR 1,2,3         | 12-16       | 1.53           | 2.33               | 0.8          | 8.81E-03 | Ryanodine receptor              |
| up       | TNNT 1-3          | 9-10        | 8.98           | 9.51               | 0.53         | 4.10E-02 | Troponin T                      |

**Supplemental Figure 6 – Cardiac *CRTC* KD and OE concertedly regulate metabolism in the heart.**

**(A, left)** Volcano plot of genes differentially regulated in hearts with cardiac-specific *CRTC* KD.

**(A, right)** Differentially regulated genes fall into GO categories primarily related to cell metabolism.

**(B, left)** Volcano plot of genes differentially regulated in hearts with cardiac-specific *CRTC* OE.

**(B, right)** Differentially regulated genes fall into GO categories primarily related to cell metabolism.

**(C)** Cardiomyopathy markers that were upregulated in response to cardiac *CRTC* OE. *CRTC* is shown as a reference and to validate the heart-specific over expression. DIOPT Score indicates similarity between fly and human gene (scores are 1-16, 16 indicates high homology).

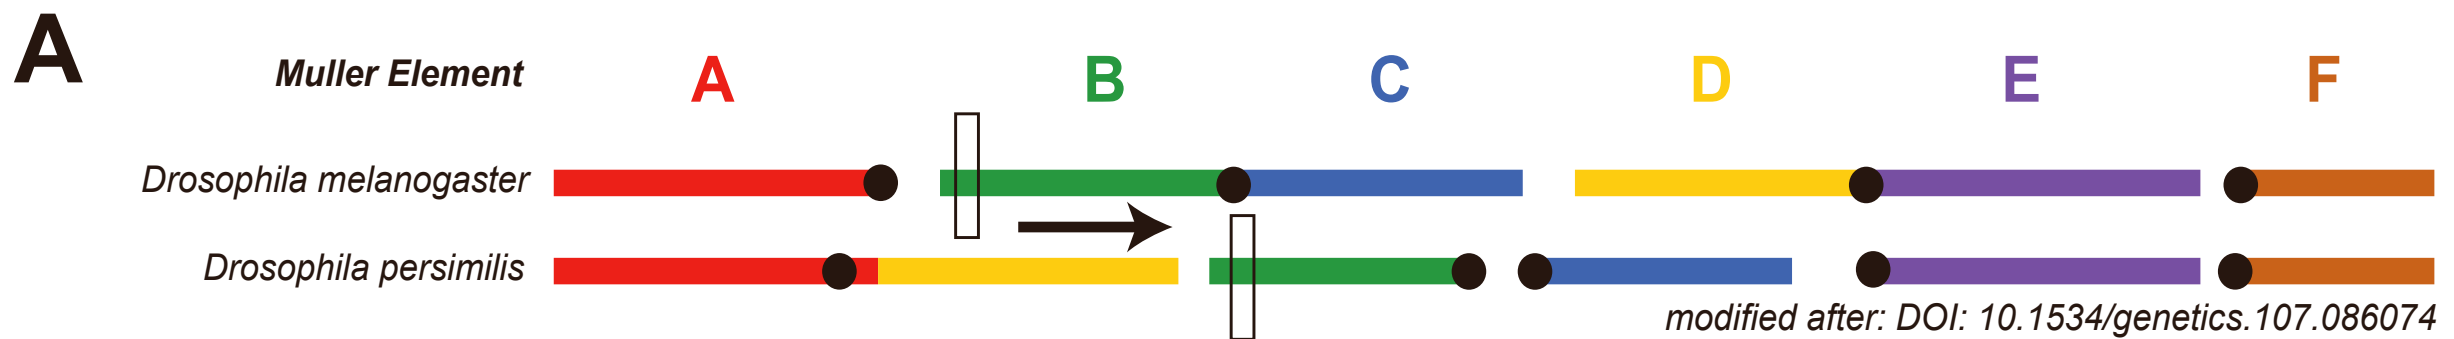

aligned genomic DNA sequences (example for 2L region)

*D.mel* TTTCGTTTTATTTCTGTTTTTCACTGCGCTCTTCGGTTCTTTCTTTC-----TTTGCTTTCA**TGTCACGTCACT**TT-----TTTCACCGCTGGAT

*D.per* CTTC----TAGCTTCTGATCCGTTTTGGGCTCTTTGTTGCTGCCTTTGTGCACTCGTTTCGTTTCA**CGTCACGTCACT**TTATATTTTTTTCTTCGCGAGAT

conserved TFBS (Creb motif)

keep if  
-2kb/+1kb of TSS (Dmel)

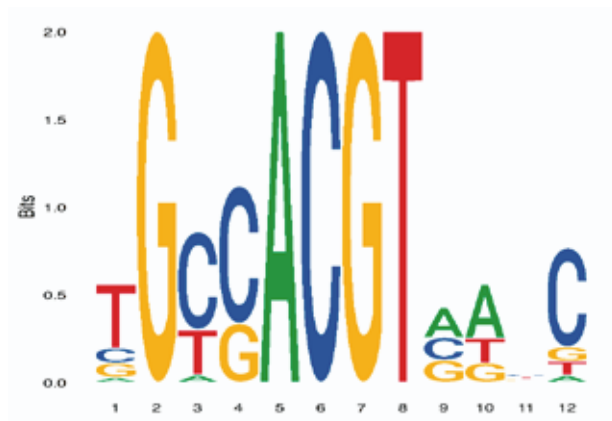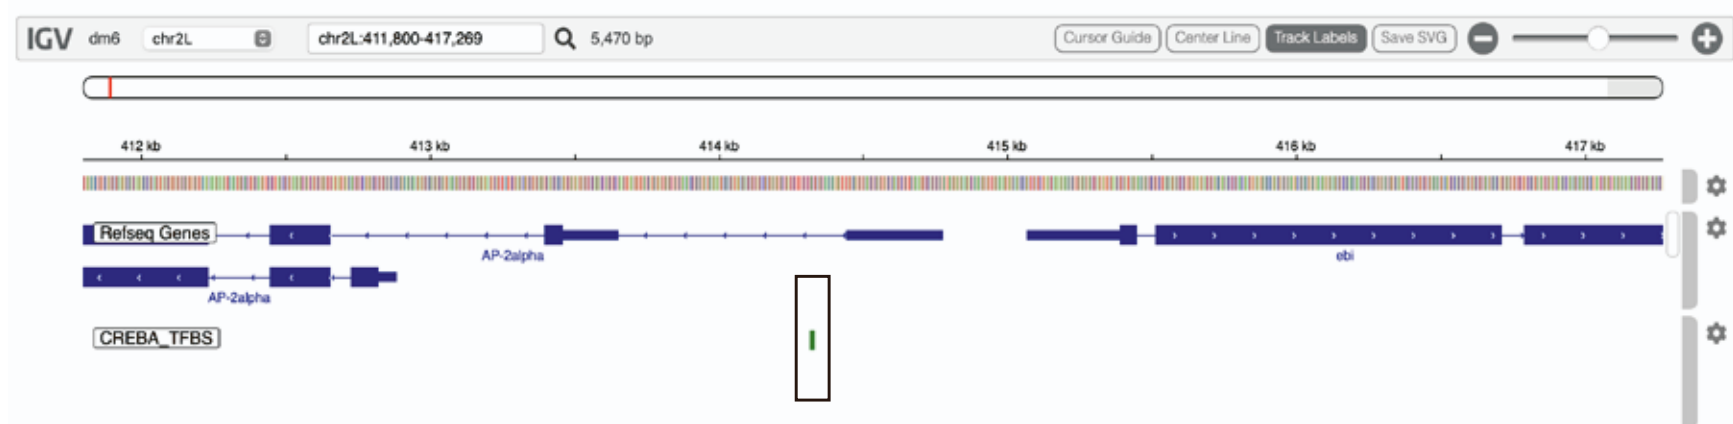

**B**

| Drosophila Genes with CREB Binding Sites |         |         |         |         |                |            |              |           |             |          |          |
|------------------------------------------|---------|---------|---------|---------|----------------|------------|--------------|-----------|-------------|----------|----------|
| 5-HT7                                    | CG10082 | CG14777 | CG32473 | CG4452  | CG9313         | eEF1alpha1 | H            | mRpS9     | PH4alphaEFB | Sh       | tn       |
| Abi                                      | CG10194 | CG14826 | CG32679 | CG45087 | CG9426         | eg         | haf          | msi       | PH4alphaSG2 | sha      | Top3beta |
| abs                                      | CG10254 | CG14854 | CG32982 | CG45101 | CG9568         | eIF4E3     | hdc          | Msp300    | Pld         | shakB    | Tpst     |
| Ac13E                                    | CG10383 | CG14883 | CG33116 | CG4570  | CG9773         | Eip93F     | heix         | MsR1      | porin       | side     | trpl     |
| Acbp3                                    | CG10467 | CG14968 | CG33203 | CG4617  | CG9911         | eRF3       | Herc4        | MTA1-like | ppk5        | side-III | Tsp66E   |
| AdSS                                     | CG10576 | CG14985 | CG33223 | CG46307 | CG9967         | ERR        | Him          | Mtap      | Prps        | sif      | TwlC     |
| Ae2                                      | CG10616 | CG15625 | CG33543 | CG46308 | CHAT           | Ets65A     | Hipk         | mtm       | Rab1        | SIFaR    | tx       |
| akirin                                   | CG10778 | CG15814 | CG34167 | CG4766  | Cht7           | Evi5       | HLH4C        | Muc4B     | Rab18       | siz      | Uck      |
| alphaCOP                                 | CG10907 | CG1607  | CG34199 | CG4813  | cic            | Faf2       | how          | Mur2B     | rad         | slgA     | Ugt36F1  |
| AnxB9                                    | CG10919 | CG1632  | CG34210 | CG4829  | Cip4           | fd59A      | Hrb27C       | MYPT-75D  | Rassf       | Slh      | UQCR-C2  |
| AP-1mu                                   | CG11035 | CG1640  | CG34408 | CG5065  | ck             | Fip1       | Hsp22        | NAT1      | Rel         | slif     | Vha55    |
| AP-2alpha                                | CG11141 | CG1677  | CG34461 | CG5644  | Clamp          | fog        | Ide          | Nep3      | Rgk2        | sls      | Vha68-2  |
| Arf51F                                   | CG1136  | CG17068 | CG3492  | CG5758  | cN-IIIB        | foxo       | lh           | Nop17l    | rn          | Smurf    | vir-1    |
| Arl1                                     | CG11426 | CG17233 | CG3640  | CG5860  | Cog6           | Fpps       | IntS1        | nord      | Roe1        | Spn      | Vmat     |
| AsnRS                                    | CG11438 | CG17271 | CG3652  | CG5910  | Cog7           | Fs         | Jafrac2      | Nrx-1     | Rox8        | sr       | Vps13B   |
| AsnS                                     | CG11777 | CG17364 | CG3719  | CG5916  | Cp15           | fs(1)Ya    | Jarid2       | Nsf2      | RpL13       | Sr-CIII  | wal      |
| AspRS-m                                  | CG11873 | CG17544 | CG3829  | CG6051  | Cp18           | fwe        | jvl          | nw        | RpL31       | sra      | wbl      |
| bai                                      | CG12054 | CG17598 | CG3847  | CG6055  | Cpr49Ae        | garz       | KdelR        | nyo       | RpLP2       | SrpK79D  | Wnt10    |
| beat-la                                  | CG12307 | CG17600 | CG3916  | CG6201  | Cpr73D         | GatA       | l(1)G0320    | Oatp30B   | Saf6        | SrpRbeta | Wnt6     |
| betaCOP                                  | CG12531 | CG17672 | CG42390 | CG6333  | Csk            | GCC185     | lbk          | Obp56i    | sand        | ssh      | wol      |
| BobA                                     | CG12948 | CG17739 | CG42455 | CG6638  | CtBP           | gce        | lin-28       | Obp57c    | sano        | St3      | wrapper  |
| brm                                      | CG13051 | CG17778 | CG42498 | CG6678  | cu             | gcl        | Lip1         | Optix     | sbb         | Svil     | Zasp66   |
| brp                                      | CG13064 | CG18258 | CG42637 | CG7236  | Cyp316a1       | Gclm       | Liprin-alpha | Orct      | sca         | svp      | zfh1     |
| bru2                                     | CG13622 | CG18659 | CG42752 | CG7414  | Cyt-c-p        | Gdi        | loj          | ort       | Scm         | Swim     |          |
| brun                                     | CG13627 | CG2918  | CG42823 | CG7600  | Dap160         | geko       | mAChR-B      | Osi6      | Scr         | Syp      |          |
| btl                                      | CG13698 | CG31055 | CG43069 | CG7685  | daw            | Gfat2      | Manf         | Ostgamma  | sdt         | Syt4     |          |
| Ca-alpha1D                               | CG13806 | CG31086 | CG43078 | CG7778  | Dek            | Gld        | Max          | Pak       | Sec23       | tal-AA   |          |
| Ca-Ma2d                                  | CG13887 | CG31321 | CG43135 | CG7896  | DIP-theta      | Glut4EF    | mbl          | PAN3      | Sec24AB     | tank     |          |
| Cad99C                                   | CG14075 | CG31862 | CG43175 | CG8006  | dnc            | Gmap       | Mbs          | PAPLA1    | Sec24CD     | tara     |          |
| CAP                                      | CG14182 | CG31871 | CG43450 | CG8008  | dpr1           | Gp93       | MED15        | Pask      | Sec61beta   | Ten-a    |          |
| Catsup                                   | CG14246 | CG31949 | CG4360  | CG8012  | dpr11          | GstD3      | MetRS        | Pcyl1     | Sec61gamma  | Ten-m    |          |
| Cdc16                                    | CG14247 | CG32104 | CG43861 | CG8142  | Dys            | GstD4      | Mnt          | Pde6      | Sec63       | Tep4     |          |
| CDK2AP1                                  | CG14346 | CG32235 | CG44270 | CG8757  | E(sp)j m6-BFM  | GstD5      | mRpL49       | Pfrix     | SecCl       | TH1      |          |
| Cdk4                                     | CG14566 | CG32281 | CG44362 | CG9150  | E(sp)j m8-HLH  | GXIVsPLA2  | mRpS14       | Pgant7    | SF2         | ThrRS    |          |
| CenG1A                                   | CG14760 | CG32365 | CG44433 | CG9297  | sp)j malpha-Bf | Gyc76C     | mRpS24       | PGRP-LA   | sfl         | Tlk      |          |

**C**

|                       | Differential expression | Not differentially expressed | total        |
|-----------------------|-------------------------|------------------------------|--------------|
| <b>with CREB-TFBS</b> | <b>101</b>              | <b>814</b>                   | <b>915</b>   |
| <b>No CREB-TFBS</b>   | <b>1074</b>             | <b>11938</b>                 | <b>13912</b> |
| <b>total</b>          | <b>1175</b>             | <b>12752</b>                 | <b>13927</b> |

**D**

| gene    | FCA heart cell counts | Human Ortholog | Function                                                 | DIOPT |
|---------|-----------------------|----------------|----------------------------------------------------------|-------|
| CG13315 | 466.79                | no ortholog    | unknown                                                  | -     |
| CG9297  | 299.60                | Srl            | SR Ca <sup>2+</sup> binding protein                      | 11    |
| AdipoR  | 247.33                | Adipor1        | Glucose/lipid metabolism                                 | 16    |
| CG32549 | 241.77                | NT5C2          | enable 5'-nucleotidase activity.                         | 15    |
| CG43693 | 240.98                | SLC36A1        | Amino Acid transporter                                   | 13    |
| aralar1 | 229.88                | ARALAR         | Mitochondrial Ca <sup>2+</sup> binding transport protein | 18    |
| Prat2   | 198.49                | PRAT           | Glutamine amidotransferase                               | 17    |
| Sodh-1  | 194.95                | SORD           | Sorbitol dehydrogenase 1                                 | 17    |
| CG9331  | 142.51                | GRHPR          | glycerate dehydrogenase                                  | 9     |
| trbl    | 113.93                | TRIB           | Trib family of kinase-like protein                       | 16    |
| CG3902  | 81.16                 | ACADSB         | AA transporter                                           | 16    |
| CG5910  | 79.49                 | no ortholog    | unknown                                                  | -     |
| Adgf-D  | 47.39                 | ADGF-C         | Adenosine deaminase-related growth factor                | 12    |
| Cyp6a23 | 31.55                 | CYP3A5         | Cytochrome P450 6a23                                     | 9     |
| Act42A  | 20.81                 | ACTB           | Actin                                                    | 12    |

FCA (FlyCellAtlas) myocardial cell count expressing each gene from snRNAseq.  
DIOPT Score (1-19) indicates the number of tools showing homolog between the genes (v.9, [https://www.flyrnai.org/cgi-bin/DRSC\\_orthologs.pl](https://www.flyrnai.org/cgi-bin/DRSC_orthologs.pl))

## Supplemental Figure 7- Identification of conserved TFBS

(A) Workflow for the identification of conserved TFBS.

(B) Fly genes with CREB binding sites conserved between *Drosophila melanogaster* and *Drosophila persimilis*

(C) Contingency table for genes with CREB TFBS and differential expression after *CRTC* KD -or- OE. Hypergeometric test for enrichment analysis using the values from the contingency table indicates that genes with CREB TFBS are more likely found to be overexpressed than genes without.

(D) *CRTC* Contra-regulated cardiac genes with conserved CREB binding sites.

**A**

| Trascript    | Gene  | Chrom. | Start    | Stop     | Strand | Lenght | VCM 1 | ACM 1 | VCM 2 | ACM 2 |
|--------------|-------|--------|----------|----------|--------|--------|-------|-------|-------|-------|
| NM_001098482 | CRTC1 | 19     | 18683615 | 18782334 | +      | 6992   | 0.230 | 0.181 | 0.103 | 0.231 |
| NM_015321    | CRTC1 | 19     | 18683615 | 18782334 | +      | 6944   | 0.480 | 0.595 | 0.615 | 0.643 |
| NM_181715    | CRTC2 | 1      | 1.54E+08 | 1.54E+08 | -      | 2678   | 1.788 | 1.677 | 1.548 | 1.574 |
| NM_001042574 | CRTC3 | 15     | 90529886 | 90645346 | +      | 5248   | 1.829 | 1.425 | 1.838 | 1.574 |
| NM_022769    | CRTC3 | 15     | 90529886 | 90645346 | +      | 5251   | 2.519 | 2.477 | 2.082 | 1.572 |

**B****CRTC1 Expression**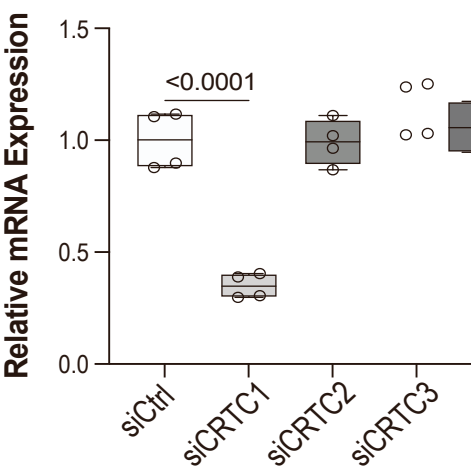**C****CRTC2 Expression**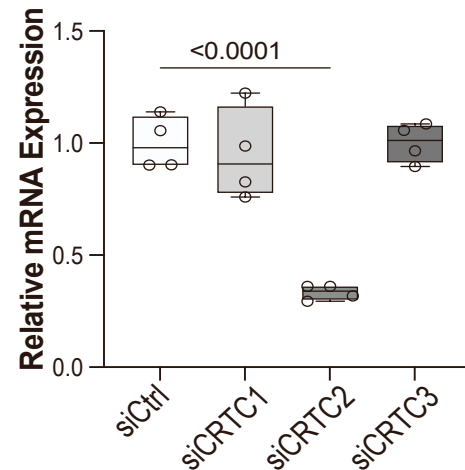**D****CRTC3 Expression**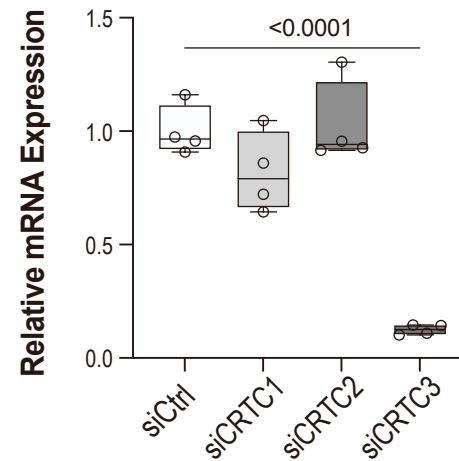**E**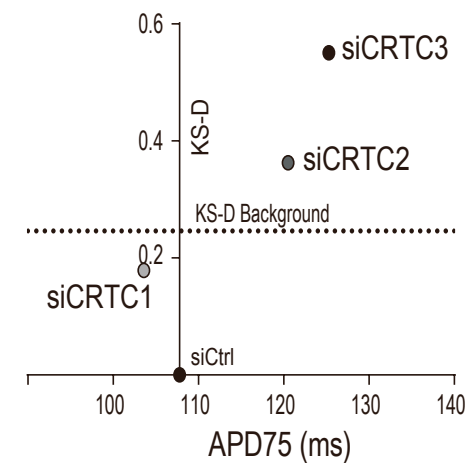**F****APD50 (ms)**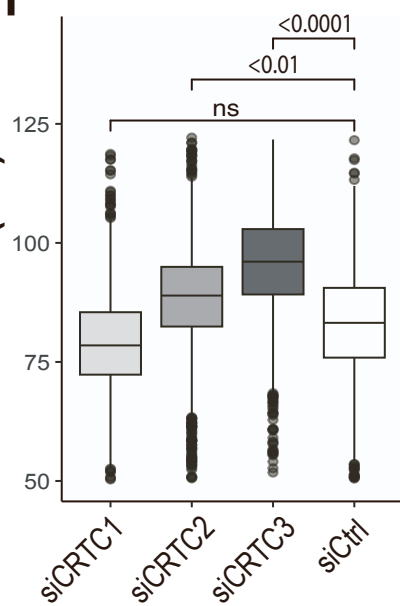**G****APD90 (ms)**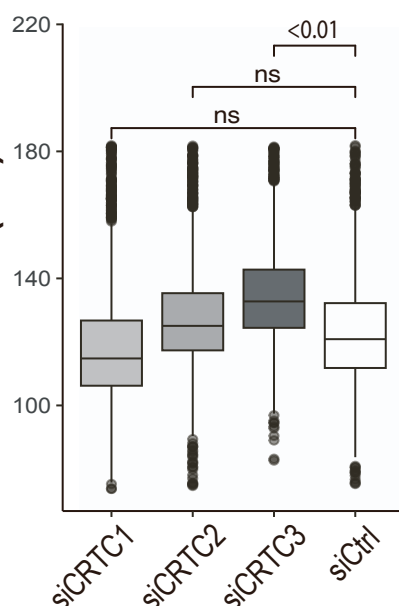**H****Peak Decay Time-Median (ms)**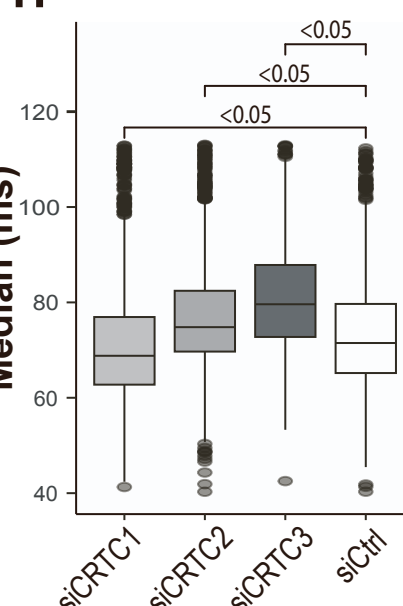**I****Cardiomyocytes size**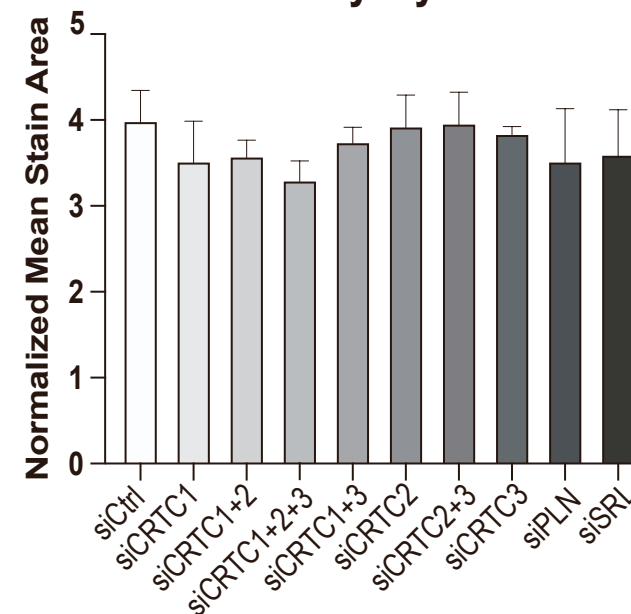



**Supplemental Figure 8 – *CRTC 2 & 3* affect cardiac function in hiPSC-Cardiomyocytes (hiPSC-CM).**

**(A)** Relative gene expression in ventricular-like (VCM1) and atrial-like cardiomyocytes (ACM1) at day 12 (early cardiac progenitors) and at day 25 (VCM-2 and ACM-2).

**(B-D)** Relative mRNA expression shows that siRNA against *CRTC1,2&3* efficiently KD the specific isoform in hiPSC-CMs.

**(E)** K-S distance plot of APD<sub>75</sub> versus K-S distance shows significant increases in APD<sub>75</sub> with KD of either *CRTC2* or *CRTC3* but not KD of *CRTC1*.

**(F)** Action Potential Duration (APD) was significantly increased with siRNA-mediated KD of *CRTC 3 and CRTC 2* at 50% repolarization and at **(G)** 90% repolarization. siRNA-mediated KD of *CRTC1* had no effect on APD. (**APD50** siCtrl n=1382, siCRTC1 n=1527, siCRTC2 n=1498, siCRTC3 n=1390; **APD90** siCtrl n=1333, siCRTC1 n=1466, siCRTC2 n=1421, siCRTC3 n=1299).

**(H)** *CRTC3* KD and *CRTC2* both caused significant increases in peak decay times (siCtrl n=1339, siCRTC1 n=1456, siCRTC2 n=1436, siCRTC3 n=1329). Significance determined by unpaired t-test, \*p<0.05, \*\*p<0.01, \*\*\*\*P<0.0001.

**(I)** Cardiomyocytes size did not change in response to *CRTC* and *Srl* KD. (siCtrl n=4, siCRTC1 n=6, siCRTC1+2 n=3, siCRTC1++3 n=5, siCRTC1+3 n=3, siCRTC2 n=2, siCRTC2+3 n=3, siCRTC3 n=3, siPLN n=4, siSRL n=4, Krustal-Wallis test)
